# Supplementary material
Source: publisher figshare collection journal article supplement (https://acs.figshare.com/ndownloader/files/3758695)

**Figure 1S.** Reverse Phase-Fast Protein Liquid Chromatography (RP-FPLC) chromatograms of water/salt soluble extracts from control and bioprocessed wheat bran. Ct: untreated bran (time 0); End, endogenous enzymes; E: exogenous enzymes; End/E: endogenous and exogenous enzymes; St: controlled fermentation; St/E, controlled fermentation and exogenous enzymes; Sp/E, spontaneous fermentation and exogenous enzymes. The dashed line refers to the the gradient of eluent B.

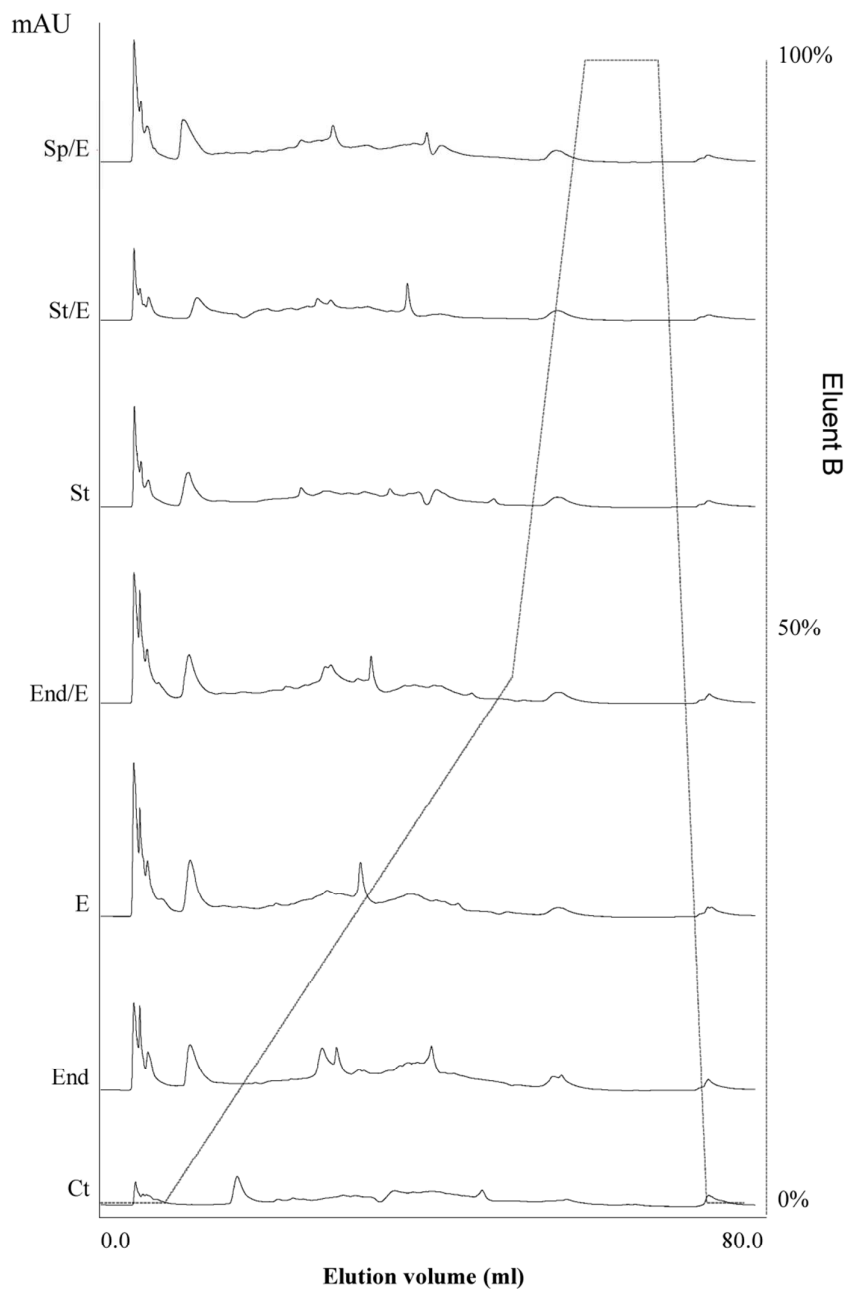

Supplement: Supplementary file 1 [file 3758695]
